# Supplementary material for: Carbon cloth supported cobalt phosphide as multifunctional catalysts for efficient overall water splitting and zinc–air batteries
Source: Royal Society of Chemistry journal article supplement (doi:10.1039/c7nr06859j), 2017-01-01
Supplement: c7nr06859j2.pdf [file c7nr06859j2.pdf]

## Supporting Information

### **Carbon Cloth Supported Cobalt Phosphide as Multifunctional Catalysts for Efficient Overall Water Splitting and Zinc-air Batteries**

Yafei Cheng, Fan Liao\*, Wen Shen, Liangbin Liu, Binbin Jiang, Yanqing Li\*, Mingwang Shao\*

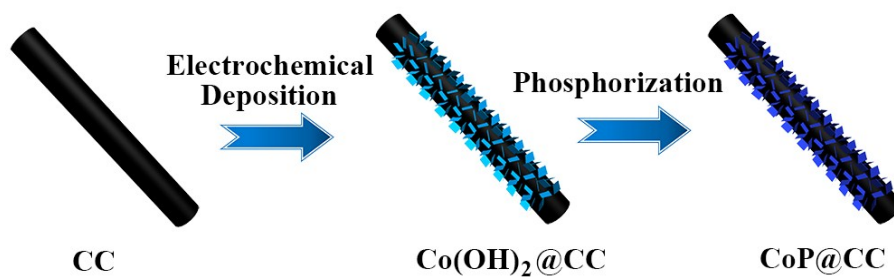

Figure S1. Schematic of the preparation of CoP@CC.

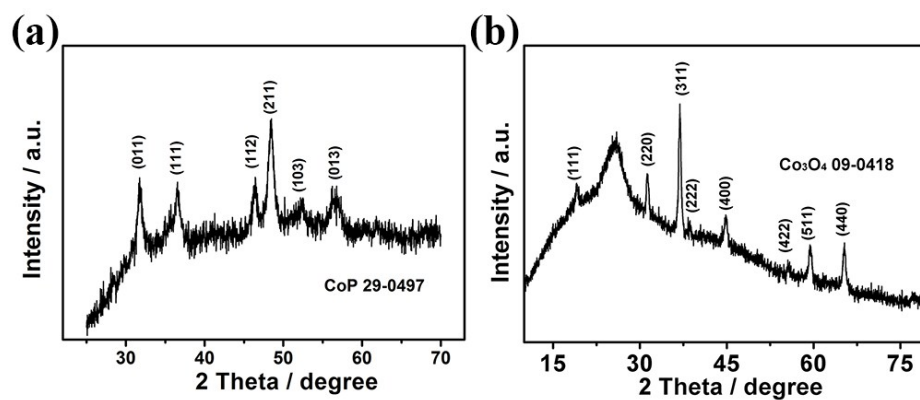

Figure S2. The XRD patterns of (a) CoP powder, and (b) Co<sub>3</sub>O<sub>4</sub>@CC.

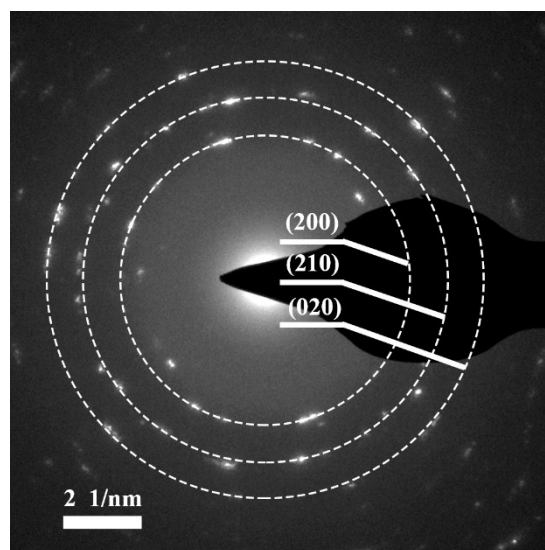

Figure S3. The SAED pattern of CoP@CC.

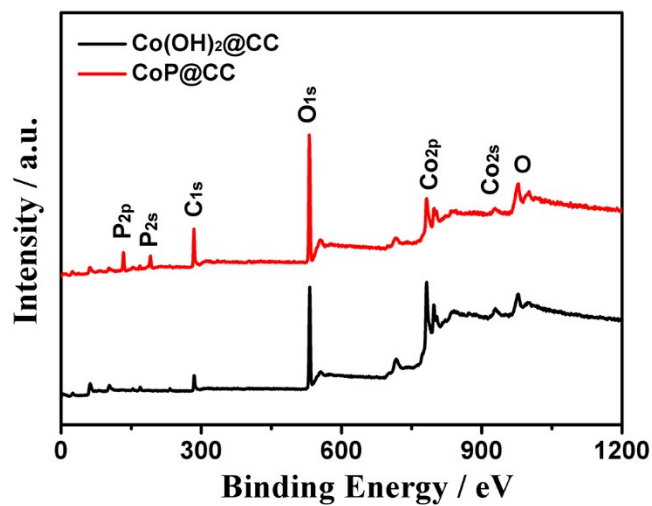

Figure S4. The survey spectra of  $\text{Co(OH)}_2\text{@CC}$  and  $\text{CoP@CC}$ .

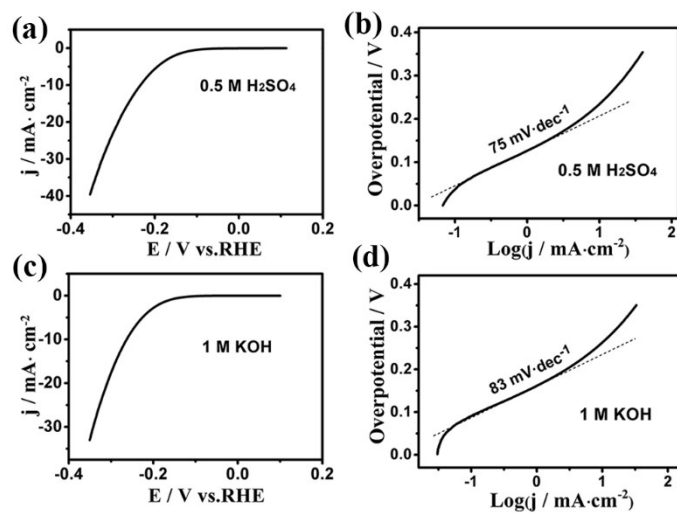

Figure S5. The HER performance of pure CoP powder.

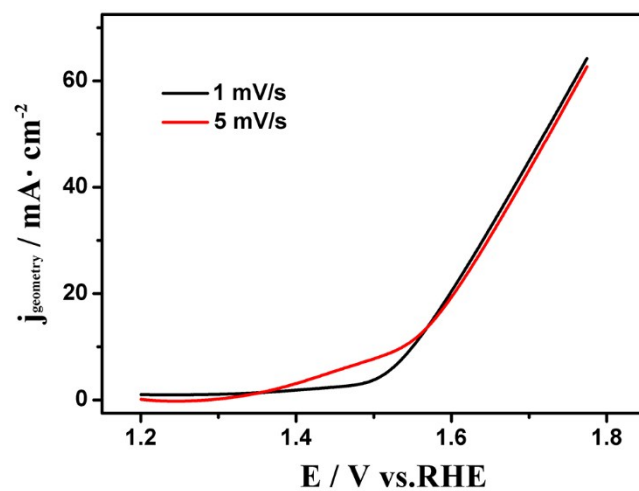

Figure S6. The OER performance of CoP@CC at different scan rates.

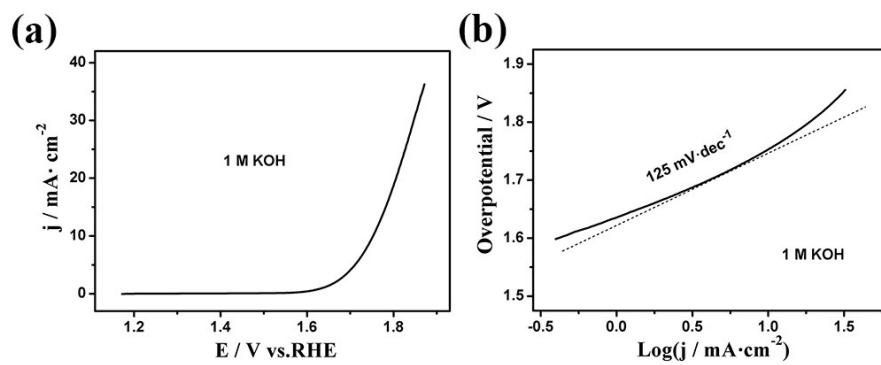

Figure S7. The OER performance of pure CoP powder.
